# Supplementary material for: The Experience of 3D Total-Body Photography to Monitor Nevi: Results From an Australian General Population-Based Cohort Study
Source: PubMed Central journal article supplement (PMC10334884; doi:10.2196/37034), 2022-06-20
Supplement: derma_v5i2e37034_app1.pdf [file derma_v5i2e37034_app1.pdf]

# VECTRA Feedback

Record ID \_\_\_\_\_

**Not many people have experienced total body 3D photography using the VECTRA to monitor their naevi. Hence we would like feedback on the use of the VECTRA and how it made people feel to better inform us on future use in clinical practice.**

**Please note there are no right or wrong answers it's all about your personal views and experiences.**

In your view, what are the benefits of total 3D body photography using the VECTRA?

\_\_\_\_\_

In your view, what are the disadvantages of total 3D body photography using the VECTRA (if any)?

\_\_\_\_\_

How effective do you believe total body 3D imaging was at monitoring changes in your moles?

- Very effective
- Effective
- Unsure
- Slightly not effective
- Not at all effective

How much do you trust this total body 3D imaging for the diagnosis and monitoring of your moles?

- Completely trust
- Slightly trust
- Unsure
- Slightly do not trust
- Completely do not trust

How comfortable were you in participating in the total 3D body photography?

- Very comfortable
- Comfortable
- Indifferent
- Slightly not comfortable
- Not at all comfortable

Can you please describe a bit more on what makes you feel comfortable?

\_\_\_\_\_

Can you please describe a bit more on what makes you feel not comfortable?

\_\_\_\_\_

Would you consider using the VECTRA if it becomes commercially available with your regular medical practitioner?

- Yes
- No

Please specify why not

\_\_\_\_\_

---

How much would you be willing to spend on this service if it became available at your dermatologist's practice?

- \$0
- \$0 to \$50
- \$51 to \$100
- \$101 to \$200
- \$201 or more

---

Please provide us with any other feedback you may have in regards to your experience with the total body 3D photography:

---

# Exit Survey

Please complete the survey below for the Mind your Moles study

Thank you for participating in the Mind your Moles study and helping us fight against melanoma!

- 
- 1) How comfortable were you in participating in the 3D total body photography?  Very comfortable  
 Comfortable  
 Indifferent  
 Slightly not comfortable  
 Not at all comfortable
- 
- 2) If you stated that you were comfortable participating in the 3D total body photography, please describe what makes you feel comfortable: \_\_\_\_\_
- 
- 3) If you stated that you were not comfortable participating in the 3D total body photography, please describe what makes you feel uncomfortable: \_\_\_\_\_
- 
- 4) How much do you trust total body imaging for the diagnosis and monitoring of your moles?  Completely trust  
 Slightly trust  
 Unsure  
 Slightly do not trust  
 Completely do not trust

## Do you agree with the following statements regarding 3D total body photography:

- |                                                                    | Yes                   | No                    |
|--------------------------------------------------------------------|-----------------------|-----------------------|
| 5) It is useful                                                    | <input type="radio"/> | <input type="radio"/> |
| 6) It can improve diagnosis and monitoring of skin lesions         | <input type="radio"/> | <input type="radio"/> |
| 7) It can improve teaching people about their skin conditions      | <input type="radio"/> | <input type="radio"/> |
| 8) It can be used for discovering new insights into skin wellbeing | <input type="radio"/> | <input type="radio"/> |
| 9) It feels like an intrusion on your privacy                      | <input type="radio"/> | <input type="radio"/> |
| 10) It can make you feel uncomfortable                             | <input type="radio"/> | <input type="radio"/> |

- 
- 11) In your view, what are the benefits of total 3D body photography using the VECTRA? \_\_\_\_\_
- 
- 12) In your view, what are the disadvantages of total 3D body photography using the VECTRA? \_\_\_\_\_
- 
- 13) Would you rather be photographed by a:  Man  
 Woman  
 No opinion

**Would you like to:**

- |                                                                                                                         | Yes                                 | No                                |
|-------------------------------------------------------------------------------------------------------------------------|-------------------------------------|-----------------------------------|
| 14) See the images at the end of the consultation?                                                                      | <input type="radio"/>               | <input type="radio"/>             |
| 15) Discuss the images with a doctor?                                                                                   | <input type="radio"/>               | <input type="radio"/>             |
| 16) Have a copy of the images?                                                                                          | <input type="radio"/>               | <input type="radio"/>             |
| <hr/>                                                                                                                   |                                     |                                   |
| 17) Would you consider using VECTRA if it becomes commercially available with your regular medical practitioner?        | <input type="radio"/> Yes           | <input type="radio"/> No          |
| <hr/>                                                                                                                   |                                     |                                   |
| 18) How much would you be willing to spend on this service?                                                             | <input type="radio"/> \$0           | <input type="radio"/> \$1 - 50    |
|                                                                                                                         | <input type="radio"/> \$51 - 100    | <input type="radio"/> \$101 - 200 |
|                                                                                                                         | <input type="radio"/> \$201 or more |                                   |
| <hr/>                                                                                                                   |                                     |                                   |
| 19) Would you recommend total 3D body photography to your friends and family?                                           | <input type="radio"/> Yes           | <input type="radio"/> No          |
| <hr/>                                                                                                                   |                                     |                                   |
| 20) Please provide us with any other feedback you may have in regards to your experience with the total 3D photography: | <hr/>                               |                                   |
| <hr/>                                                                                                                   |                                     |                                   |
| 21) Would you like to be contacted about participating in future studies related to melanoma imaging?                   | <input type="radio"/> Yes           | <input type="radio"/> No          |
